# Supplementary material
Source: PubMed Central journal article supplement (PMC3228874)
Supplement: NIHMS333652-supplement-2.pdf [file NIHMS333652-supplement-2.pdf]

**From:** Katharine H Dunn <khdunn@MIT.EDU>  
**Subject:** RE: [Oapolicyoptout] Opt Out request:CONFIRMATION OF WAIVER  
**Date:** October 18, 2011 11:36:03 AM EDT  
**To:** Mark Bear <mbear@mit.edu>, "oapolicyoptout@mit.edu" <oapolicyoptout@mit.edu>

---

Hello Professor Bear,

Thank you for this notice, accepted on behalf of Ann Wolpert, the Provost's designate for waivers of the MIT Faculty Open Access Policy.

As noted in the policy: "The Provost or Provost's designate will waive application of the policy for a particular article upon written notification by the author, who informs MIT of the reason."

The policy is therefore waived for this article by receipt of your message below.

Thank you, and best wishes for your publication,

Katharine Dunn

Katharine Dunn  
Projects Librarian  
MIT Libraries, 14E-210  
617-253-9879  
khdunn@mit.edu  
<http://libraries.mit.edu/scholarly>

-----Original Message-----

From: oapolicyoptout-bounces@MIT.EDU [mailto:oapolicyoptout-bounces@MIT.EDU] On Behalf Of Mark Bear  
Sent: Tuesday, October 18, 2011 11:06 AM  
To: oapolicyoptout@mit.edu  
Subject: [Oapolicyoptout] Opt Out request

Nature Manuscript # 2010-10-12653A-Z  
Mutations causing syndromic autism define an axis of synaptic pathophysiology  
Authors: Benjamin D. Auerbach, Emily K. Osterweil and Mark F. Bear

The above-referenced manuscript has been accepted for publication at Nature. The publisher requires that we obtain a waiver from the Office of the Provost opting out of MIT's open access policy before the paper can be published. I would appreciate your forwarding me such a waiver as soon as possible.

Thank you.  
Mark Bear

Mark F. Bear, Ph.D.  
Picower Professor of Neuroscience  
The Picower Institute for Learning and Memory  
Department of Brain and Cognitive Sciences  
Massachusetts Institute of Technology  
77 Massachusetts Avenue, 46-3301  
Cambridge, MA 02139  
Telephone: 617-324-7002

---

Oapolicyoptout mailing list  
Oapolicyoptout@mit.edu  
<http://mailman.mit.edu/mailman/listinfo/oapolicyoptout>
